# Supplementary material for: The Velvet Protein UvVEA Regulates Conidiation and Chlamydospore Formation in Ustilaginoidea virens
Source: MDPI journal article supplement (doi:10.3390/jof8050479), 2022-05-04
Supplement: s1 [file s1]

**Table S1.** The primers used in this study.

| Primers      | Sequence (5'-3')                            |
|--------------|---------------------------------------------|
| qUvVEA F     | CATGCAAACCATGCCACTCC                        |
| qUvVEA R     | TACGGCGAGGATAGAGCAGA                        |
| UvVEA F      | ATGCCGTCCACTGCTCCAG                         |
| UvVEA R      | TCATCCTGCAAAGACATCGGA                       |
| pKO-UvVEA F  | TTCTGACCCGGGGATCCTCTCCTGCATCTCACTCGGT       |
| pKO-UvVEA R  | GGCCAGTGCCAAGCTTCACCGCCCCAACAAATCCAC        |
| UvVEA CR F   | ACCTTCTCGAATAAGCTGAATGAC                    |
| UvVEA CR R   | AAACGTCATTCACTTATTCGAGA                     |
| UvVEA KO1 F  | GGATCTTCCAGAGATTCATCTCGTTCCTGTCAACC         |
| UvVEA KO1 R  | GCTCCTTCAATATCATCTTCTGTTCTGTCACTGTTTCGCTGTG |
| UvVEA KO2 F  | CGAGGGCAAAGGAATAGAGTACACGACAGTGACAGTGAGAGT  |
| UvVEA KO2 R  | CTGCCGTTTCGACGATTCTTTGGAACCTGGATGGA         |
| UvVEA AD F   | GGAGGCCAGTGAATTCATGCCGTCCACTGCTCC           |
| UvVEA AD R   | CGAGCTCGATGGATCCTCATCCTGCAAAGACATC          |
| UvVEA BK F   | CATGGAGGCCGAATTCATGCCGTCCACTGCTCC           |
| UvVEA BK R   | GCAGGTCGACGGATCCTCATCCTGCAAAGACATC          |
| qUvVELB F    | CAACAAGAGCAGAGCTCCCA                        |
| qUvVELB R    | GCCAACCTTGACGTTTGCAT                        |
| UvVELB F     | ATGCCGCCGTCGTCGGCGCAC                       |
| UvVELB R     | TCAATCCCCATAATCGTCGTC                       |
| pKO-UvVELB F | TTCTGACCCGGGGATCCAGTCGTACACGCGATAAGCC       |
| pKO-UvVELB R | GGCCAGTGCCAAGCTTCGGTGCGAAATCAGAAATG         |
| UvVELB CR F  | ACCTCAAGAGCAGAGCTCCCATTC                    |
| UvVELB CR R  | AAACGAATGGGAGCTCTGCTCTTG                    |
| UvVELB KO1 F | GGATCTTCCAGAGATTCGGTGCGAAATCAGAAATG         |
| UvVELB KO1 R | GCTCCTTCAATATCATCTTCTGTTGTTGGAGGTGCGAGACAT  |
| UvVELB KO2 F | CGAGGGCAAAGGAATAGAGTAGGCGATGACGACGATTAT     |
| UvVELB KO2 R | CTGCCGTTTCGACGATTTACAGTCCAAGCCTTTCACA       |
| UvVELB AD F  | GGAGGCCAGTGAATTCATGCCGCCGTCGTCGGC           |
| UvVELB AD R  | CGAGCTCGATGGATCCTCAATCCCCATAATCG            |
| UvVELB BK F  | CATGGAGGCCGAATTCATGCCGCCGTCGTCGGC           |
| UvVELB BK R  | GCAGGTCGACGGATCCTCAATCCCCATAATCG            |
