# Supplementary material for: The Velvet Protein UvVEA Regulates Conidiation and Chlamydospore Formation in Ustilaginoidea virens
Source: MDPI journal article supplement (doi:10.3390/jof8050479), 2022-05-04
Supplement: s1 [file s1]

**Table S2.** Conidial sizes and germination rate of the  $\Delta UvVEA$  and  $\Delta UvVELB$  mutants.

| Strain          | Conidial length ( $\mu\text{m}$ ) <sup>a</sup> | Conidial width ( $\mu\text{m}$ ) | Germination rate (%) <sup>b</sup> |
|-----------------|------------------------------------------------|----------------------------------|-----------------------------------|
| Jt209           | 7.29 $\pm$ 0.60 A                              | 3.89 $\pm$ 0.35 A                | 93.28 $\pm$ 1.33 A                |
| $\Delta UvVEA$  | 7.05 $\pm$ 0.23 A                              | 3.92 $\pm$ 0.17 A                | 94.45 $\pm$ 2.37 A                |
| $\Delta UvVELB$ | 7.02 $\pm$ 0.47 A                              | 3.86 $\pm$ 0.24 A                | 94.32 $\pm$ 1.84 A                |

- a. The conidia sizes (length and width) were measured by microscope (50 conidia per strain).
- b. Conidia were coated on YT medium. The conidia germination rates were calculated after 24 h incubation in the dark.
- c. Data from at least three replicates were analyzed with the protected Fisher's least significant difference (LSD) test. Different letters mark statistically significant differences ( $P \leq 0.01$ ).
